# Supplementary material for: Rational fabrication of hybrid structure of SnOx sandwiched between TiO2 and carbon based on the complementary merits of SnOx, TiO2 and carbon, and its improved lithium storage properties
Source: Royal Society of Chemistry journal article supplement (doi:10.1039/c5ra04629g), 2015-01-01
Supplement: c5ra04629g1.pdf [file c5ra04629g1.pdf]

Supporting information

**Rational fabrication of hybrid structure of SnO<sub>x</sub> sandwiched between TiO<sub>2</sub> and carbon based on the complementary merits of SnO<sub>x</sub>, TiO<sub>2</sub> and carbon, and its improved lithium storage properties**

Qinghua Tian,<sup>a</sup> Zhengxi Zhang,<sup>a</sup> Li Yang<sup>a,\*</sup> and Shin-ichi Hirano<sup>b</sup>

<sup>a</sup>School of Chemistry and Chemical Engineering, Shanghai Jiao Tong University,

Shanghai 200240, P. R. China

<sup>b</sup>Hirano Institute for Materials Innovation, Shanghai Jiao Tong University, Shanghai

200240, P. R. China

\*Corresponding author e-mail address: [liyangce@sjtu.edu.cn](mailto:liyangce@sjtu.edu.cn),

[zhengxizhang@sjtu.edu.cn](mailto:zhengxizhang@sjtu.edu.cn)

Tel: +86 21 54748917, Fax: +86 21 54741297

---

\* Corresponding author. Tel.: +86 21 54748917; fax: +86 21 54741297.  
E-mail address: [liyangce@sjtu.edu.cn](mailto:liyangce@sjtu.edu.cn) (L. Yang), [zhengxizhang@sjtu.edu.cn](mailto:zhengxizhang@sjtu.edu.cn).

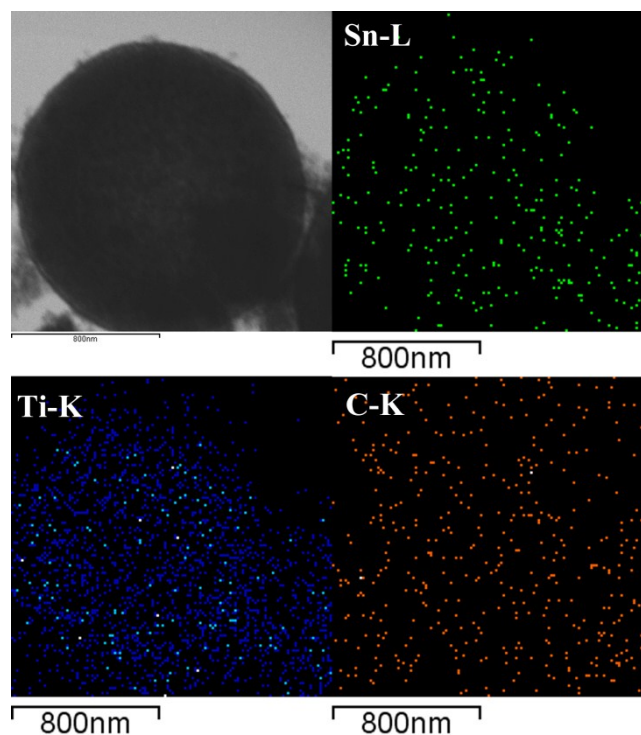

**Fig. S1** The TEM mapping images of different elements of  $\text{TiO}_2@\text{SnO}_x@\text{C}$ . It can be seen that the Ti mainly distributes in the middle part of  $\text{TiO}_2@\text{SnO}_x@\text{C}$ . And The C can be seen on the outmost edge of  $\text{TiO}_2@\text{SnO}_x@\text{C}$ . It is suggested that the  $\text{SnO}_x$  is sandwiched between  $\text{TiO}_2$  and C coating layer. No obvious contrast between middle and edge can be observed which can be attributed to the thin carbon coating layer.
